# Supplementary material for: Evaluating the degree of oxygenation of organic aerosol during foggy and hazy days in Hong Kong using high-resolution time-of-flight aerosol mass spectrometry (HR-ToF-AMS)
Source: Copernicus journal article supplement (doi:10.5194/acp-13-8739-2013), 2013-09-03
Supplement: Supplementary file 1 [file acp-13-8739-2013-supplement.pdf]

Supplementary Materials for:

**Evaluating the degree of oxygenation of organic aerosol during foggy and hazy days in Hong Kong using high-resolution time-of-flight aerosol mass spectrometry (HR-ToF-AMS)**

Y.J. Li<sup>1</sup>, B.Y.L. Lee<sup>1</sup>, J.Z. Yu<sup>1,2</sup>, N.L. Ng<sup>3</sup> and C.K. Chan<sup>1,4</sup>

<sup>1</sup>Division of Environment, Hong Kong University of Science and Technology, Hong Kong, China

<sup>2</sup>Department of Chemistry, Hong Kong University of Science and Technology, Hong Kong, China

<sup>3</sup>School of Earth and Atmospheric Sciences, Georgia Institute of Technology, Atlanta, Georgia, USA

<sup>4</sup>Department of Chemical and Biomolecular Engineering, Hong Kong University of Science and Technology, Hong Kong, China

Manuscript submitted to *Atmospheric Chemistry and Physics*, 18<sup>th</sup>, Jul, 2013

Correspondence to: C.K. Chan ([keckchan@ust.hk](mailto:keckchan@ust.hk))

## 1. Supporting graphs

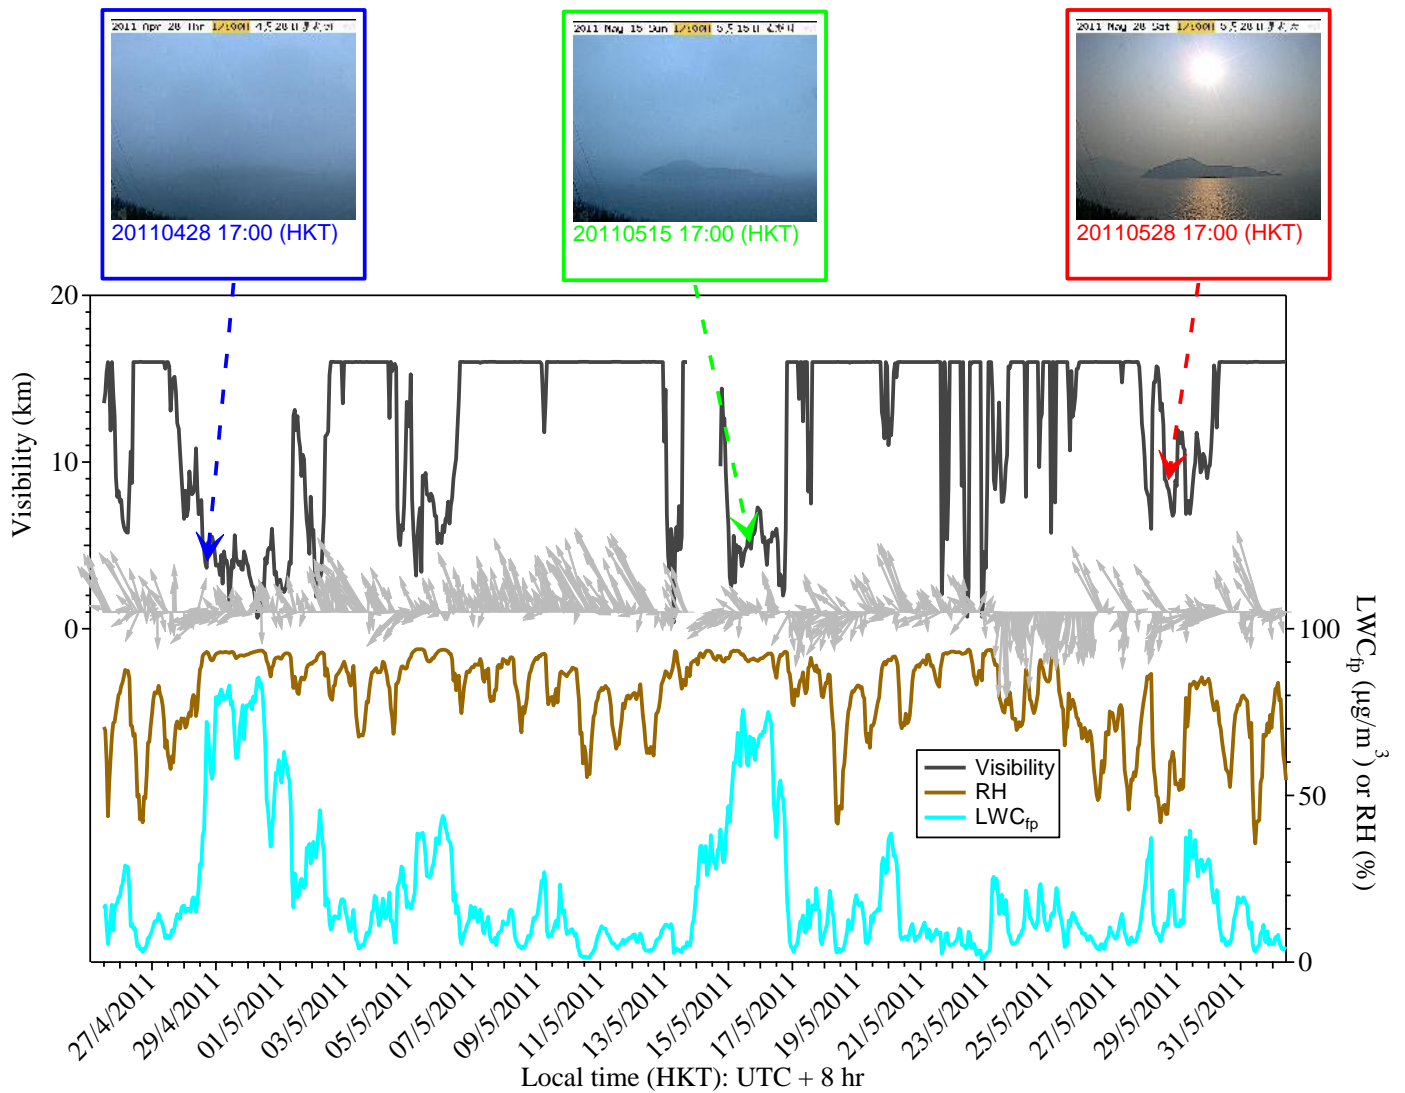

**FIGURE S1.** Visibility, wind vector, RH, and estimated liquid water content in fine particles ( $LWC_{fp}$ ), as well as selected pictures taken during the campaign. Pictures were taken with an automatic camera on an island approximately 20 km south of the sampling site.

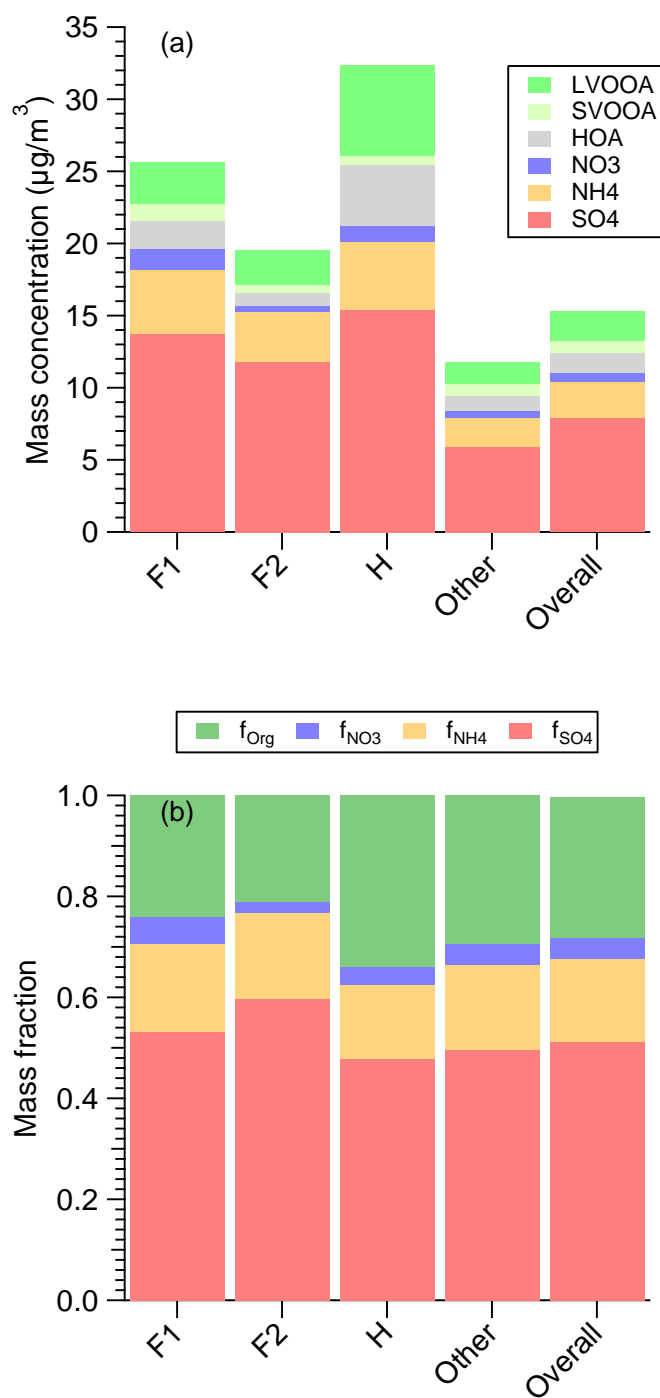

**FIGURE S2.** (a) Average mass concentrations of LVOOA, SVOOA, HOA, nitrate, ammonium and sulfate in five periods: foggy periods (*F1* and *F2*), hazy period (*H*), non-foggy and non-hazy period (“other”), and overall period. (b) Average mass fractions of organics, nitrate, ammonium and sulfate in the five periods.

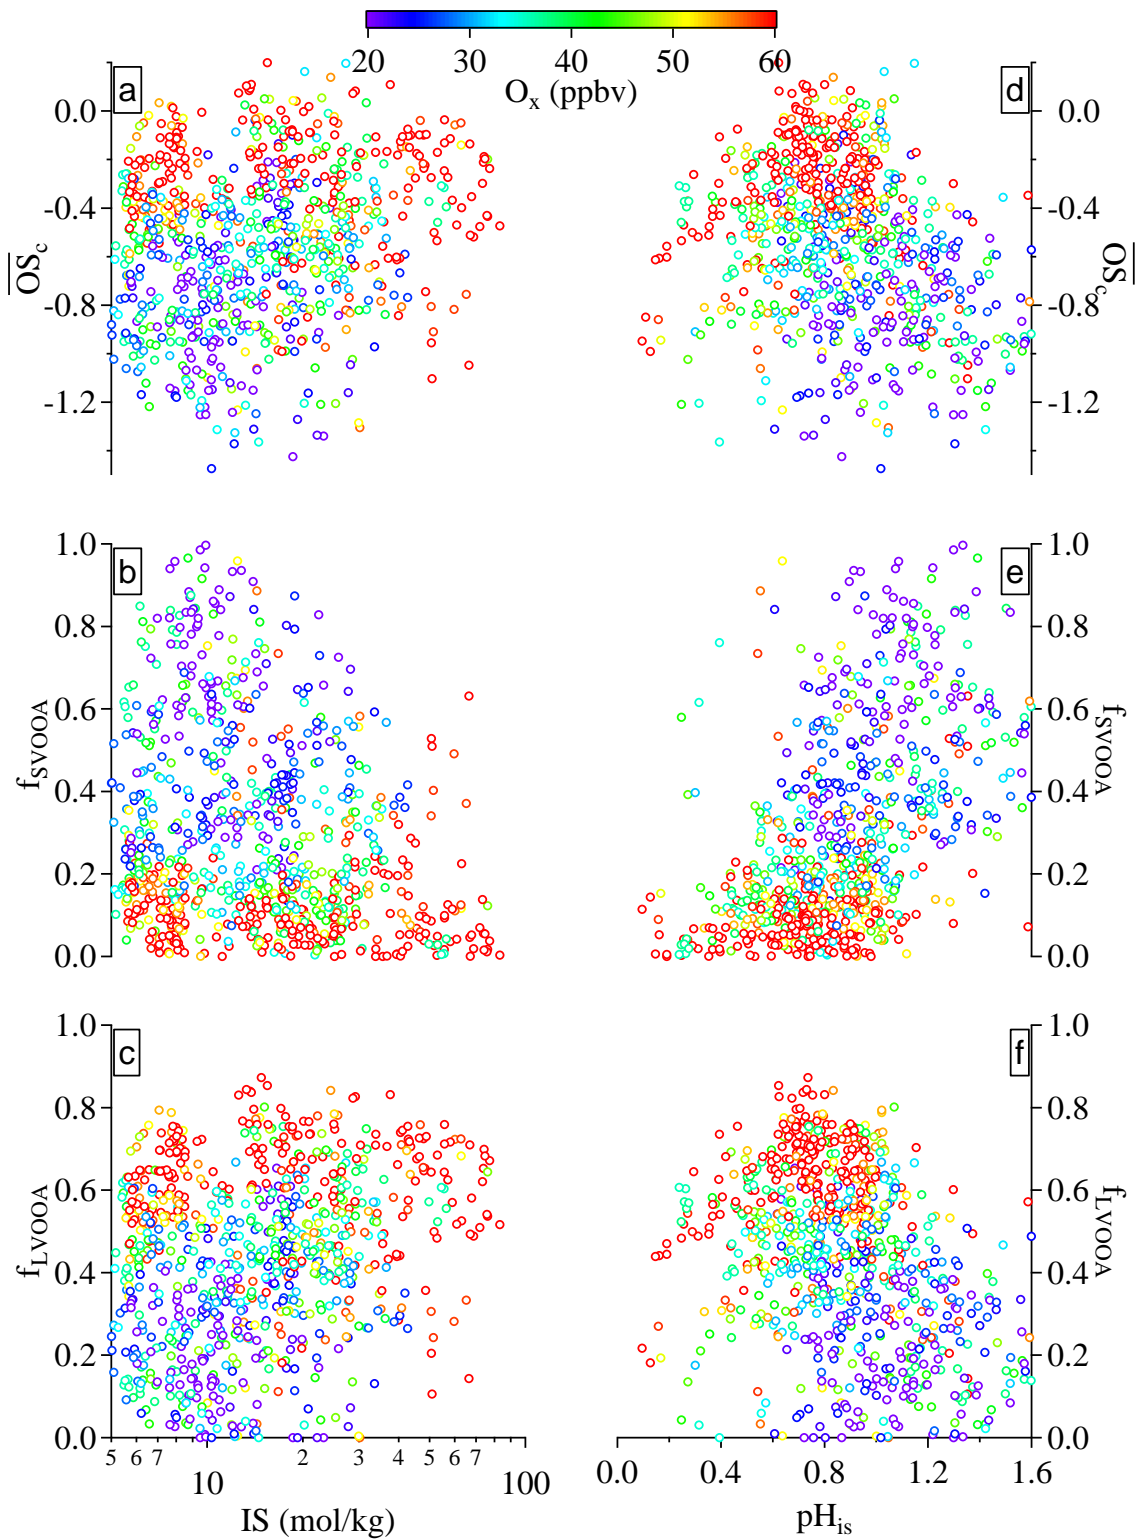

**FIGURE S3.** Hourly averaged carbon oxidation state ( $\overline{OS}_c$ ) (a), SVOOA fraction ( $f_{SVOOA}$ ) (b), and LVOOA fraction ( $f_{LVOOA}$ ) (c) plotted against estimated ionic strength (IS). Carbon oxidation state ( $\overline{OS}_c$ ) (d), SVOOA fraction ( $f_{SVOOA}$ ) (e), and LVOOA fraction ( $f_{LVOOA}$ ) (f) plotted against estimated fine particle in situ pH ( $pH_{is}$ ). All data points are color coded according to  $O_x$  concentration.

## 2. Positive matrix factorization (PMF)

High-resolution mass spectral data were used to run the positive matrix factorization (PMF) analysis. PMF was run for 1 to 7 factors, with FPeak and Seed both set to 0. A three-factor solution was chosen based on  $Q/Q_{\text{exp}}$  values and mass spectral features. The diagnostic plots (Zhang et al., 2011) are shown in Figure S4. These three factors are hydrocarbon-like organic aerosol (HOA), semi-volatile organic aerosol (SVOOA), and low-volatility organic aerosol (LV-OOA). The four-factor solution would only split the LV-OOA factor to two sub-factors and was thus not chosen. The mass fractions of these factors from PMF analysis of high-resolution mass spectral data were used directly, while they were multiplied by mass concentration of organics obtained by unit-mass-resolution data analysis when mass concentrations of these three factors were presented.

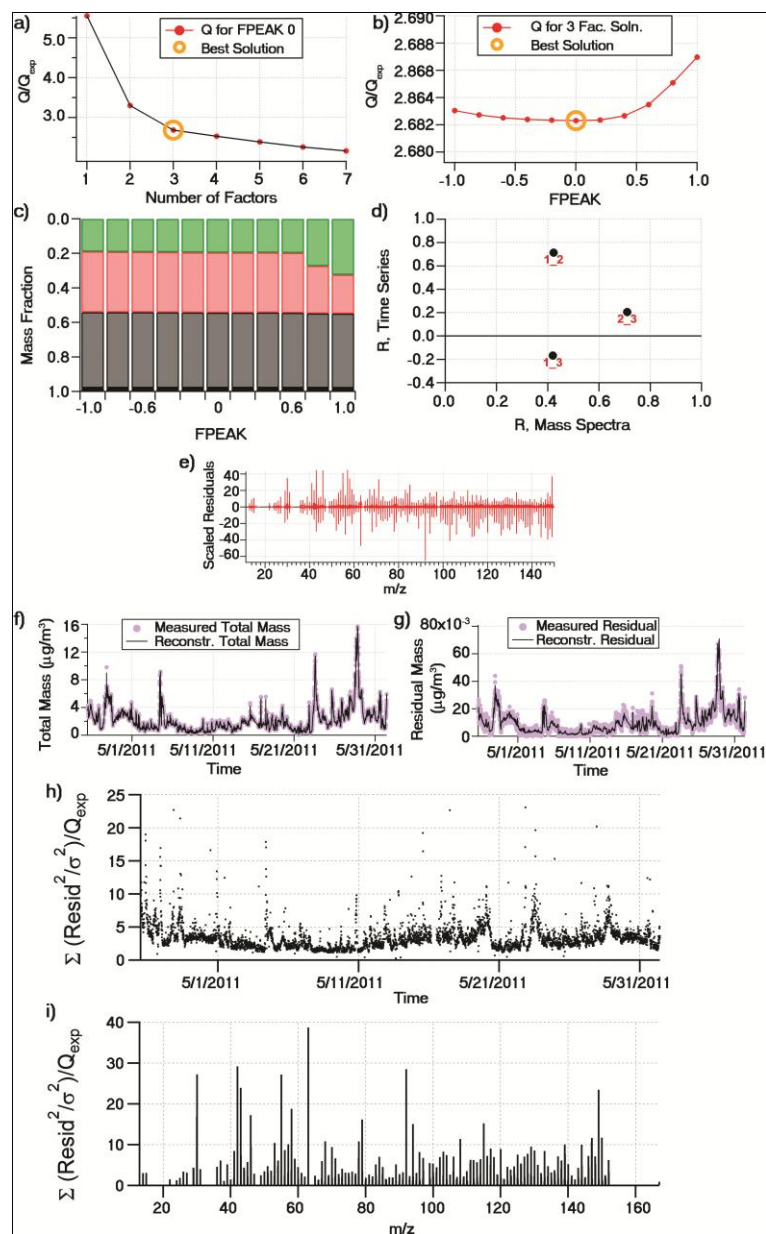

**FIGURE S4.** Summary of key diagnostic plots of the PMF analysis on the V-mode OA spectra. (a)  $Q/Q_{exp}$  as a function of number of factors ( $P$ ) selected for PMF modeling; (b)  $Q/Q_{exp}$  as a function of FPEAK; (c) fractions of OA factors vs. FPEAK; (d) correlations among PMF factors; (e) the box and whiskers plot showing the distributions of scaled residuals for each  $m/z$ ; (f) time series of the measured organic mass and the reconstructed organic mass; (g) variations of the residual (= measured – reconstructed) of the fit; (h) the  $Q/Q_{exp}$  for each point in time; (i) the  $Q/Q_{exp}$  values for each  $m/z$

### 3. Reference

Zhang, Q., Jimenez, J. L., Canagaratna, M. R., Ulbrich, I. M., Ng, N. L., Worsnop, D. R., and Sun, Y. L.: Understanding atmospheric organic aerosols via factor analysis of aerosol mass spectrometry: a review, *Anal. Bioanal. Chem.*, 401, 3045-3067, 2011.
